# Supplementary material for: Ingested Salmonella enterica, Cronobacter sakazakii, Escherichia coli O157:H7, and Listeria monocytogenes: transmission dynamics from adult house flies to their eggs and first filial (F1) generation adults
Source: PubMed Central journal article supplement (PMC4520200; doi:10.1186/s12866-015-0478-5), 2015-07-31
Supplement: 12866_2015_478_MOESM2_ESM.pdf [file 12866_2015_478_MOESM2_ESM.pdf]

**Additional file 2 - Analysis of Maximum Likelihood Estimates (MLE) of the logistic regression model**

(A) house fly eggs and (B) house fly first filial (F<sub>1</sub>) generation of adults .

|                                          | Parameter                       | df | Estimate (β) | SE     | Wald X <sup>2</sup> | p value |
|------------------------------------------|---------------------------------|----|--------------|--------|---------------------|---------|
| <b>A) House fly eggs*</b>                |                                 |    |              |        |                     |         |
|                                          | Intercept                       |    | -3.5312      | 340.4  | 0.0001              | 0.9917  |
|                                          | <b>Bacterial levels in food</b> |    |              |        |                     |         |
|                                          | Low                             | 1  | 4.0345       | 340.4  | 0.0001              | 0.9905  |
|                                          | Medium                          | 1  | 5.8210       | 340.4  | 0.0003              | 0.9864  |
|                                          | High                            | 1  | 5.1965       | 340.4  | 0.0002              | 0.9878  |
|                                          | Control                         | 1  | -15.0520     | 1021.2 | 0.0002              | 0.9882  |
|                                          | <b>Foodborne pathogen</b>       |    |              |        |                     |         |
|                                          | <i>C. sakazakii</i>             | 1  | 1.3926       | 0.5951 | 5.4761              | 0.00193 |
|                                          | <i>E. coli</i> O157:H7          | 1  | -0.3518      | 0.4093 | 0.7389              | 0.3900  |
|                                          | <i>L. monocytogenes</i>         | 1  | 0.3052       | 0.4506 | 0.4589              | 0.4981  |
|                                          | <i>S. enterica</i>              | 1  | -1.3460      | 0.3954 | 11.5897             | 0.0007  |
| <b>B) House fly F<sub>1</sub> adults</b> |                                 |    |              |        |                     |         |
|                                          | <i>S. enterica</i> **           |    |              |        |                     |         |
|                                          | Intercept                       | 1  | -9.5199      | 38.1   | 0.0006              | 0.9803  |
|                                          | <b>Bacterial levels in food</b> |    |              |        |                     |         |
|                                          | Low                             | 1  | -9.0274      | 693    | 0.0002              | 0.9896  |
|                                          | Medium                          | 1  | 9.4699       | 386.1  | 0.0006              | 0.9804  |
|                                          | High                            | 1  | 8.5848       | 386.1  | 0.0005              | 0.9823  |
|                                          | Control                         | 1  | -9.0274      | 1005.1 | 0.0001              | 0.9928  |
|                                          | <b>Body part</b>                |    |              |        |                     |         |
|                                          | Alimentary canal                | 1  | -0.4397      | 0.0889 | 24.4646             | <0.0001 |
|                                          | Surface                         | 1  | 0.4397       | 0.0889 | 24.4646             | <0.0001 |
|                                          | <i>C. sakazakii</i> ***         |    |              |        |                     |         |
|                                          | Intercept                       | 1  | -10.4840     | 535.1  | 0.0004              | 0.9844  |
|                                          | <b>Bacterial levels in food</b> |    |              |        |                     |         |
|                                          | Low                             | 1  | -8.7161      | 960.6  | 0.0001              | 0.9928  |
|                                          | Medium                          | 1  | 8.3305       | 535.1  | 0.0002              | 0.9876  |
|                                          | High                            | 1  | 9.1017       | 535.1  | 0.0003              | 0.9864  |
|                                          | Control                         | 1  | -8.7161      | 1437.0 | 0.0001              | 0.9928  |
|                                          | <b>Body part</b>                |    |              |        |                     |         |
|                                          | Alimentary canal                | 1  | -0.4393      | 0.1162 | 14.2930             | 0.0002  |
|                                          | Surface                         | 1  | 0.4393       | 0.1162 | 14.2930             | 0.0002  |

SE= Standard error.

**\*Summary of stepwise selection (n=64):** Bacterial concentration: df=3, X<sup>2</sup>= 76.294, p<0.0001; Foodborne pathogen: df=3, X<sup>2</sup>= 15.4601, p=0.0015; Bacterial concentration\* Foodborne pathogen: df=9, Wald X<sup>2</sup>=0, p=1. **Model fit statistics:** Area Under the ROC Curve

(AUC)=0.8889, AIC: 220.772, likelihood ratio test= 110.8146, df=6,  $P < 0.0001$ , Score= 84.9562, Wald= 18.1559,  $R^2=0.8230$ , Max-rescaled  $R^2=0.8509$ , Somers's  $D_{xy} = 0.8889$ .

**\*\*Summary of stepwise selection (n=96):** Bacterial concentration: df=3,  $X^2=139.8853$ ,  $p < 0.0001$ ; body part: df=1,  $X^2=24.9831$ ,  $p < 0.0001$ . **Model fit statistics:** Area Under the ROC Curve (AUC)=0.8732, AIC=961.115, likelihood ratio test=215.9087, df=4,  $p < 0.0001$ , Score=160.5856, Wald=45.3982,  $R^2=0.8945$ , Max-rescaled  $R^2=0.8945$ , Somers's  $D_{xy}=0.746$ .

**\*\*\*Summary of stepwise selection (n=96):** Bacterial concentration: df=3,  $X^2=54.6138$ ,  $p < 0.0001$ ; body part: df=1,  $X^2=14.8349$ ,  $p=0.0001$ . **Model fit statistics:** Area Under the ROC Curve (AUC)=0.8239, AIC=612.986, likelihood ratio test=92.7704, df=4,  $p < 0.0001$ , Score=68.4558, Wald=23.5347,  $R^2=0.6195$ , Max-rescaled  $R^2=0.6206$ , Somers's  $D_{xy}=0.648$ .
