# Supplementary material for: Ingested Salmonella enterica, Cronobacter sakazakii, Escherichia coli O157:H7, and Listeria monocytogenes: transmission dynamics from adult house flies to their eggs and first filial (F1) generation adults
Source: PubMed Central journal article supplement (PMC4520200; doi:10.1186/s12866-015-0478-5), 2015-07-31
Supplement: 12866_2015_478_MOESM3_ESM.pdf [file 12866_2015_478_MOESM3_ESM.pdf]

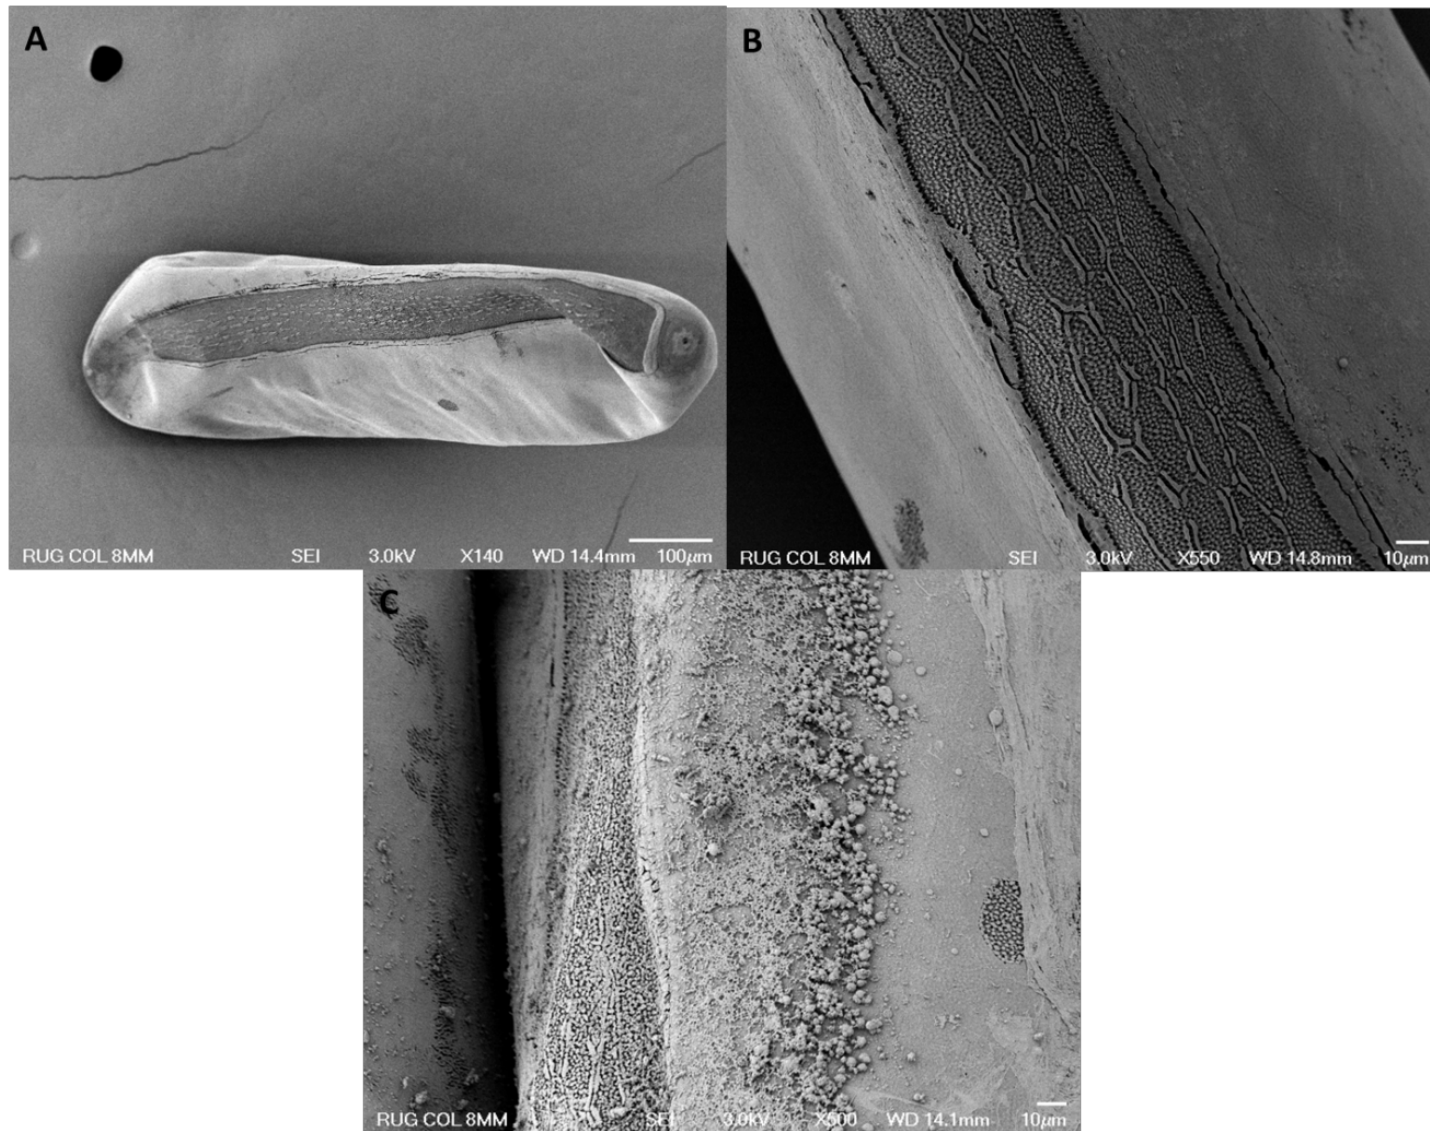

**Additional file 3 - Scanning Electron Microscopy (SEM) of surface-disinfected house fly (*Musca domestica*) eggs**  
(A) house fly egg; (B) the hatching line, with distinct curved rib-like thickenings; and (C) adhesive fluid on the egg surface

**Protocol:** Surface-disinfected house fly eggs were pre-fixed in 1% glutaraldehyde in PBS, pH 7.2 for 18 h at 4°C. The eggs were then gently washed with three changes of PBS, pH 7.2 at 4°C (15 min. wash times) and post-fixed in 1% osmium tetroxide in PBS, for 24 h at 4°C. The eggs were once again washed with three changes of PBS at 4°C and then dehydrated with a graded series of ethanol (10 to 100%, 15 min at 4°C per step, with 3 exchanges of 100% ethanol), and critical point-dried (purge time, 15 min in liquid CO<sub>2</sub>, using an Autosamdri 815B (Tousimis Research Corp., Rockville, MD). The eggs were mounted onto aluminum stubs; and sputter coated with gold in argon, for 30 secs. at 50 mA, using a Denton Vacuum Desk V series sputter coater (Moorestown, NJ). Specimens were viewed in a JSM-6701F field emission SEM operated at an accelerating voltage of 3 kV.
