# Supplementary material for: Ingested Salmonella enterica, Cronobacter sakazakii, Escherichia coli O157:H7, and Listeria monocytogenes: transmission dynamics from adult house flies to their eggs and first filial (F1) generation adults
Source: PubMed Central journal article supplement (PMC4520200; doi:10.1186/s12866-015-0478-5), 2015-07-31
Supplement: 12866_2015_478_MOESM4_ESM.pdf [file 12866_2015_478_MOESM4_ESM.pdf]

**Additional file 4 - Information about foodborne bacteria, culture media, incubation conditions, and PCR-based kits used in this study**

| Foodborne pathogen*           |                          |                                            | Enrichment Media                                                                                                                                          |                                                                                                                              | PCR-based (BAX) Kit                                                       | Chromogenic Media (37°C for 24-48 h)                                                                    |
|-------------------------------|--------------------------|--------------------------------------------|-----------------------------------------------------------------------------------------------------------------------------------------------------------|------------------------------------------------------------------------------------------------------------------------------|---------------------------------------------------------------------------|---------------------------------------------------------------------------------------------------------|
| Genus and species             | Serovar/Strain           | Origin                                     | Primary enrichment / Incubation conditions                                                                                                                | Secondary enrichment / Incubation conditions                                                                                 |                                                                           |                                                                                                         |
| <i>Salmonella enterica</i>    | Schwarzengrund / SAL3542 | Alimentary canal of <i>Lucilia cuprina</i> | BPW (pre-warmed at 42°C) / Recirculating water bath at 42.5°C for 22-24 h                                                                                 | Transfer 100 µl of primary enriched sample to 400 µl of Brain-heart infusion (BHI) broth (pre-warmed at 37°C) / 37°C for 3 h | <i>Salmonella 2</i> (standard assay)                                      | <i>Salmonella</i> chromogenic agar with selective supplement (Oxoid, Cambridge, UK)                     |
| <i>Listeria monocytogenes</i> | 4b / LIS0150             | Alimentary canal of <i>Lucilia cuprina</i> | 24 <i>Listeria</i> Enrichment Broth (24 LEB) with selective supplement (freshly prepared and at room-temperature; Oxoid, Cambridge, UK) / 37°C for 44±5 h | Not applicable                                                                                                               | <i>L. monocytogenes</i> (24E assay)                                       | RAPID' <i>L.mono</i> agar (Bio-Rad Laboratories, Hercules, CA)                                          |
| <i>Cronobacter sakazakii</i>  | O2 / Md5g aka ENTB0353   | Alimentary canal of <i>Musca domestica</i> | BPW with 10 mg/L of Novobiocin (pre-warmed at 37°C) / 37°C for 22-26 h                                                                                    | Transfer 100 µl of primary enriched sample to 400 µl of BHI broth (pre-warmed at 37°C) / 37°C for 3 h                        | <i>E. sakazakii</i> (standard assay; used to detect <i>C. sakazakii</i> ) | Brilliance <i>Cronobacter</i> agar (aka Druggan-Forsythe-Iversen formulation-DFI; Oxoid, Cambridge, UK) |
| <i>Escherichia coli</i>       | O157:H7 / ESC0786        | Spinach                                    | BAX System <i>E. coli</i> O157:H7 MP media broth (pre-warmed at 42°C; DuPont Qualicon, Wilmington, DE) / 42±1°C for 18-24 h                               | Not applicable                                                                                                               | <i>E. coli</i> O157:H7 MP (standard assay)                                | R & F <i>E. coli</i> O157:H7 chromogenic plating medium (R & F Laboratories, Downers Grove, IL)         |

\*Bacterial strains were provided by U.S. Food and Drug Administration, Center for Food Safety and Applied Nutrition (FDA/CFSAN)
