# Supplementary material for: Ingested Salmonella enterica, Cronobacter sakazakii, Escherichia coli O157:H7, and Listeria monocytogenes: transmission dynamics from adult house flies to their eggs and first filial (F1) generation adults
Source: PubMed Central journal article supplement (PMC4520200; doi:10.1186/s12866-015-0478-5), 2015-07-31
Supplement: 12866_2015_478_MOESM5_ESM.pdf [file 12866_2015_478_MOESM5_ESM.pdf]

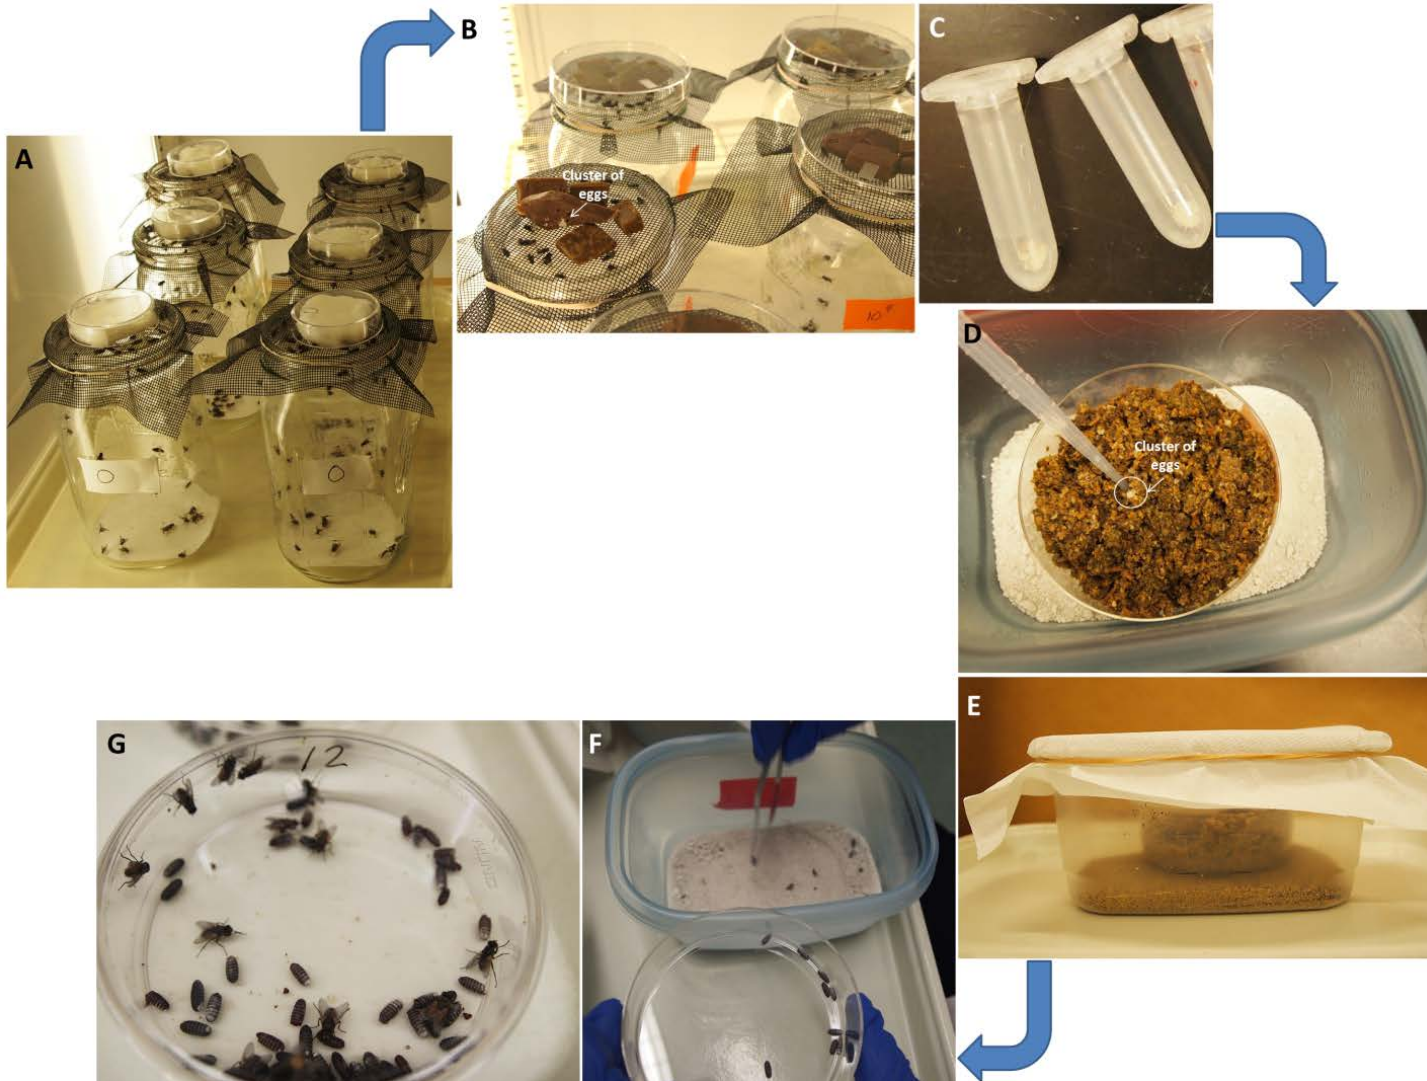

### Additional file 5 – Experimental setup

(A) feeding of the parental population of house flies, (B) oviposition substrate, (C) collected house fly eggs, (D) surface-disinfected eggs placed in the larval rearing substrate, (E) house fly larval rearing container, (F) transfer of house fly pupae to plates, (G) emergence of first filial ( $F_1$ ) generation of house fly adults.
